# Supplementary material for: Maximum Inclusion Size Evaluation and Fatigue Strength Analysis of 40Cr Structural Steel
Source: Hindawi journal article supplement (doi:10.1155/2022/4566471), 2022-04-30
Supplement: f1 [file 4566471.f1.txt]

#include <iostream.h>
#include <math.h>
#include <stdlib.h>
#include <time.h>
#include<stdio.h>
#include"math.h"

double y,p;
double g(double m, double n)
{
	double sum,temp;
	int k;
	double c[114]={ 
2.34617,3.36293,3.42193,3.53699,3.70287,3.98912,4.07599,4.27961,4.42901,4.5516,4.60624, 4.60624,4.61709,4.68167,4.7559,5.00206,5.00206,5.06173,5.1207,5.14993,5.179,5.19829, 5.21751,5.27474,5.31255,5.33136,5.34074,5.36877,5.38738,5.44283,5.46118,5.47948,5.58799, 5.69444,5.74693,5.78165,5.82477,5.82477,5.98577,6.13441,6.14256,6.21545,6.35084,6.35871,
6.36658,6.37443,6.42136,6.43693,6.43693,6.45246,6.46795,6.47568,6.48341,6.48341,6.49883,
6.51421,6.60575,6.64352,6.71096,7.17233,7.1793,7.26935,7.32421,7.40575,7.40575,7.48639,
7.53304,7.54631,7.60576,7.63203,7.63858,7.69732,7.83904,7.92159,7.93422,8.05316,8.10889,
8.25567,8.29196,8.39988,8.41774,8.45925,8.0644,8.56506,8.59423,8.61168,8.64647,8.70415,
8.73285,8.82406,8.82973,8.91433,8.92555,9.03145,9.10319,9.16892,9.31511,9.96402,10.01911,
10.03907,10.09871,10.17276,10.32413,10.70954,10.80722,11.09059,11.10412,11.80316,11.938,
12.23205,12.70562,13.22664,13.67676,13.84405,  
   };
	sum=1.0;
	for(k=0;k<114;k++)
	{	temp=1.0/m*exp(-((c[k]-n)/m+exp((n-c[k])/m)));
		sum=temp*sum;
	}
	return(sum);
}
double L(double v)
{
	double i,j,z,max;
	max=-100000000.0;
	for(j=1;j<v;j=j+0.1)
	{
		i=(v-j)/y;
		z=g(i,j);
		if(z>max)
			max=z;
	}
	return(max);
}
void main(int argc,char*argv[])
{
	double X0,X1,X2,A1,A2,B1,B2,L0,q;
//	printf("please input T\n");
//	scanf("%lf",&T);
//	y=-log(-log(1-1/T));
	y=6.02587;
	//different weight corresponds to different y；
//	printf("y=%f\n",y);
	p=1.95;
	q=6.135;
	X0=p*y+q;
	L0=g(p,q);
	X1=X0-0.1;
	do
	{
		A1=L(X1);
		B1=log(L0)-log(A1);
		if(B1==1.92)
			break;
		else
			X1=X1-0.1;
	}
	while(B1<1.92);
	X2=X0+0.1;
	do
	{
		A2=L(X2);
		B2=log(L0)-log(A2);
		if(B2==1.92)
			break;
		else
			X2=X2+0.1;
	}
	while(B2<1.92);
	printf("y=%f\n",y);
	printf("X0=%f\n",X0);
	printf("Xmin=%f\n",X1);
	printf("Xmax=%f\n",X2);
	return;
}
